# Supplementary material for: Association between the dietary inflammatory index and serum perfluoroalkyl and polyfluoroalkyl substance concentrations: evidence from NANHES 2007–2018
Source: Royal Society of Chemistry journal article supplement (doi:10.1039/d3fo01487h), 2023-10-02
Supplement: d3fo01487h8.pdf [file d3fo01487h8.pdf]

1 **Association between dietary inflammatory index and serum perfluoroalkyl and polyfluoroalkyl**  
2 **substances concentrations: evidence from NANHES 2007–2018**

3 Ren Zhou<sup>#</sup>, Jiali Peng<sup>#</sup>, Lei Zhang, Yu Sun, Jia Yan<sup>\*</sup>, and Hong Jiang<sup>\*</sup>

4 Department of Anesthesiology, The Ninth People's Hospital of Shanghai, Jiao Tong University

5 School of Medicine, Shanghai, 200011, PR China

6 **\* Corresponding author**

7 Hong Jiang

8 The Ninth People's Hospital of Shanghai, Jiao Tong University School of Medicine

9 No. 639 Zhizaoju Road, Shanghai, 200011, PR China.

10 Email: [Jianghongjiuyuan@163.com](mailto:Jianghongjiuyuan@163.com)

11 Jia Yan

12 The Ninth People's Hospital of Shanghai, Jiao Tong University School of Medicine

13 No. 639 Zhizaoju Road, Shanghai, 200011, PR China.

14 Email: [mzkyanj@163.com](mailto:mzkyanj@163.com)

15 <sup>#</sup>: Ren Zhou and Jiali Peng contributed equally to this work.

16

17

18

19

20

21

22

23

24

25

26

Table S1: Association between different food parameters and PFAS

| OUTCOME  | Food parameters     | Model 1                 |        | Model 2                 |        |
|----------|---------------------|-------------------------|--------|-------------------------|--------|
|          |                     | $\beta$ (95% CI)        | p.val  | $\beta$ (95% CI)        | p.val  |
| Sum-PFAS | Alcohol             | 0.047 (-0.001, 0.095)   | 0.057  | 0.021 (-0.033, 0.074)   | 0.441  |
| Sum-PFAS | Beta-carotene       | 0.031 (-0.012, 0.074)   | 0.156  | 0.03 (-0.018, 0.079)    | 0.218  |
| Sum-PFAS | Carbohydrate        | -0.06 (-0.115, -0.005)  | 0.032  | -0.008 (-0.063, 0.047)  | 0.767  |
| Sum-PFAS | Cholesterol         | 0.022 (-0.023, 0.068)   | 0.328  | 0.027 (-0.027, 0.081)   | 0.322  |
| Sum-PFAS | Dietary fiber       | -0.1 (-0.151, -0.049)   | 0      | -0.081 (-0.137, -0.024) | 0.006  |
| Sum-PFAS | Energy              | -0.112 (-0.167, -0.057) | <0.001 | -0.101 (-0.169, -0.033) | 0.004  |
| Sum-PFAS | Iron                | -0.062 (-0.109, -0.014) | 0.011  | -0.059 (-0.112, -0.007) | 0.027  |
| Sum-PFAS | Magnesium           | -0.07 (-0.122, -0.018)  | 0.009  | -0.061 (-0.121, 0)      | 0.051  |
| Sum-PFAS | n-3 PUFAs           | 0.083 (0.031, 0.135)    | 0.002  | 0.063 (0.013, 0.113)    | 0.014  |
| Sum-PFAS | n-6 PUFAs           | -0.032 (-0.085, 0.02)   | 0.227  | -0.012 (-0.073, 0.049)  | 0.693  |
| Sum-PFAS | Niacin              | 0.044 (-0.01, 0.098)    | 0.107  | 0.044 (-0.014, 0.102)   | 0.135  |
| Sum-PFAS | Protein             | 0.034 (-0.022, 0.09)    | 0.226  | 0.056 (-0.007, 0.119)   | 0.082  |
| Sum-PFAS | Riboflavin          | -0.039 (-0.091, 0.012)  | 0.13   | -0.033 (-0.088, 0.022)  | 0.239  |
| Sum-PFAS | Selenium            | 0.03 (-0.032, 0.092)    | 0.343  | 0.048 (-0.027, 0.123)   | 0.205  |
| Sum-PFAS | Thiamin             | -0.033 (-0.091, 0.025)  | 0.259  | -0.033 (-0.093, 0.027)  | 0.276  |
| Sum-PFAS | Total fat           | -0.1 (-0.158, -0.042)   | 0.001  | -0.072 (-0.136, -0.008) | 0.028  |
| Sum-PFAS | Total folate        | -0.049 (-0.102, 0.004)  | 0.07   | -0.047 (-0.101, 0.007)  | 0.089  |
| Sum-PFAS | Total MUFAs         | -0.071 (-0.127, -0.015) | 0.014  | -0.034 (-0.094, 0.027)  | 0.269  |
| Sum-PFAS | Total PUFAs         | -0.028 (-0.08, 0.023)   | 0.275  | -0.003 (-0.061, 0.054)  | 0.914  |
| Sum-PFAS | Total SFAs          | -0.094 (-0.149, -0.039) | 0.001  | -0.076 (-0.143, -0.01)  | 0.024  |
| Sum-PFAS | Vitamin A           | -0.05 (-0.099, -0.001)  | 0.043  | -0.052 (-0.108, 0.005)  | 0.072  |
| Sum-PFAS | Vitamin B12         | 0.008 (-0.033, 0.05)    | 0.693  | 0.003 (-0.043, 0.05)    | 0.885  |
| Sum-PFAS | Vitamin B6          | -0.013 (-0.065, 0.039)  | 0.622  | -0.022 (-0.082, 0.039)  | 0.479  |
| Sum-PFAS | Vitamin C           | 0.004 (-0.033, 0.042)   | 0.818  | 0.003 (-0.04, 0.046)    | 0.876  |
| Sum-PFAS | Vitamin D (D2 + D3) | -0.063 (-0.107, -0.019) | 0.006  | -0.076 (-0.124, -0.027) | 0.003  |
| Sum-PFAS | Vitamin E           | -0.049 (-0.094, -0.003) | 0.036  | -0.05 (-0.102, 0.001)   | 0.056  |
| Sum-PFAS | Zinc                | -0.03 (-0.089, 0.028)   | 0.301  | -0.027 (-0.087, 0.034)  | 0.385  |
| PFOS     | Alcohol             | 0.032 (-0.024, 0.088)   | 0.264  | 0.006 (-0.057, 0.069)   | 0.848  |
| PFOS     | Beta-carotene       | 0.028 (-0.024, 0.079)   | 0.292  | 0.026 (-0.032, 0.085)   | 0.371  |
| PFOS     | Carbohydrate        | -0.058 (-0.117, 0.001)  | 0.054  | -0.012 (-0.07, 0.046)   | 0.684  |
| PFOS     | Cholesterol         | 0.032 (-0.019, 0.082)   | 0.214  | 0.033 (-0.026, 0.091)   | 0.269  |
| PFOS     | Dietary fiber       | -0.12 (-0.18, -0.061)   | <0.001 | -0.099 (-0.166, -0.032) | 0.004  |
| PFOS     | Energy              | -0.109 (-0.173, -0.045) | 0.001  | -0.105 (-0.184, -0.027) | 0.009  |
| PFOS     | Iron                | -0.075 (-0.13, -0.02)   | 0.008  | -0.081 (-0.143, -0.019) | 0.012  |
| PFOS     | Magnesium           | -0.097 (-0.157, -0.037) | 0.002  | -0.082 (-0.154, -0.01)  | 0.025  |
| PFOS     | n-3 PUFAs           | 0.096 (0.035, 0.157)    | 0.003  | 0.075 (0.016, 0.135)    | 0.014  |
| PFOS     | n-6 PUFAs           | -0.026 (-0.087, 0.036)  | 0.411  | -0.006 (-0.079, 0.067)  | 0.869  |
| PFOS     | Niacin              | 0.05 (-0.014, 0.114)    | 0.124  | 0.048 (-0.023, 0.119)   | 0.182  |
| PFOS     | Protein             | 0.026 (-0.036, 0.088)   | 0.406  | 0.051 (-0.021, 0.122)   | 0.161  |
| PFOS     | Riboflavin          | -0.049 (-0.107, 0.009)  | 0.096  | -0.041 (-0.104, 0.022)  | 0.2    |
| PFOS     | Selenium            | 0.04 (-0.029, 0.109)    | 0.255  | 0.05 (-0.034, 0.135)    | 0.236  |
| PFOS     | Thiamin             | -0.038 (-0.103, 0.028)  | 0.253  | -0.043 (-0.114, 0.028)  | 0.232  |
| PFOS     | Total fat           | -0.083 (-0.153, -0.014) | 0.019  | -0.06 (-0.135, 0.015)   | 0.118  |
| PFOS     | Total folate        | -0.063 (-0.123, -0.003) | 0.039  | -0.062 (-0.125, 0.002)  | 0.058  |
| PFOS     | Total MUFAs         | -0.055 (-0.123, 0.012)  | 0.108  | -0.022 (-0.095, 0.051)  | 0.549  |
| PFOS     | Total PUFAs         | -0.021 (-0.081, 0.039)  | 0.482  | 0.004 (-0.064, 0.073)   | 0.9    |
| PFOS     | Total SFAs          | -0.073 (-0.135, -0.012) | 0.02   | -0.058 (-0.132, 0.016)  | 0.122  |
| PFOS     | Vitamin A           | -0.065 (-0.121, -0.01)  | 0.021  | -0.067 (-0.132, -0.002) | 0.043  |
| PFOS     | Vitamin B12         | 0.012 (-0.035, 0.059)   | 0.611  | 0 (-0.054, 0.055)       | 0.998  |
| PFOS     | Vitamin B6          | -0.006 (-0.066, 0.054)  | 0.843  | -0.02 (-0.09, 0.051)    | 0.581  |
| PFOS     | Vitamin C           | -0.009 (-0.051, 0.033)  | 0.68   | -0.017 (-0.065, 0.032)  | 0.491  |
| PFOS     | Vitamin D (D2 + D3) | -0.064 (-0.115, -0.013) | 0.014  | -0.08 (-0.135, -0.024)  | 0.005  |
| PFOS     | Vitamin E           | -0.064 (-0.114, -0.014) | 0.013  | -0.071 (-0.13, -0.012)  | 0.018  |
| PFOS     | Zinc                | -0.029 (-0.094, 0.036)  | 0.373  | -0.026 (-0.097, 0.044)  | 0.459  |
| PFOA     | Alcohol             | 0.07 (0.019, 0.121)     | 0.007  | 0.039 (-0.015, 0.094)   | 0.157  |
| PFOA     | Beta-carotene       | 0.014 (-0.03, 0.058)    | 0.532  | 0.024 (-0.023, 0.072)   | 0.311  |
| PFOA     | Carbohydrate        | -0.058 (-0.121, 0.005)  | 0.073  | -0.008 (-0.072, 0.056)  | 0.806  |
| PFOA     | Cholesterol         | 0.004 (-0.039, 0.047)   | 0.865  | 0.003 (-0.051, 0.057)   | 0.906  |
| PFOA     | Dietary fiber       | -0.08 (-0.127, -0.032)  | 0.001  | -0.064 (-0.115, -0.013) | 0.015  |
| PFOA     | Energy              | -0.085 (-0.137, -0.033) | 0.002  | -0.071 (-0.135, -0.007) | 0.03   |
| PFOA     | Iron                | -0.058 (-0.103, -0.013) | 0.012  | -0.044 (-0.092, 0.005)  | 0.077  |
| PFOA     | Magnesium           | -0.044 (-0.092, 0.003)  | 0.067  | -0.051 (-0.103, 0.002)  | 0.06   |
| PFOA     | n-3 PUFAs           | 0.051 (0.009, 0.092)    | 0.017  | 0.044 (0.001, 0.086)    | 0.046  |
| PFOA     | n-6 PUFAs           | -0.037 (-0.086, 0.013)  | 0.141  | -0.031 (-0.087, 0.025)  | 0.275  |
| PFOA     | Niacin              | 0.031 (-0.025, 0.087)   | 0.274  | 0.041 (-0.016, 0.099)   | 0.159  |
| PFOA     | Protein             | 0.021 (-0.039, 0.082)   | 0.483  | 0.037 (-0.032, 0.106)   | 0.288  |
| PFOA     | Riboflavin          | -0.029 (-0.079, 0.021)  | 0.258  | -0.007 (-0.065, 0.05)   | 0.804  |
| PFOA     | Selenium            | 0.017 (-0.037, 0.072)   | 0.532  | 0.045 (-0.018, 0.108)   | 0.155  |
| PFOA     | Thiamin             | -0.034 (-0.089, 0.022)  | 0.233  | -0.021 (-0.081, 0.04)   | 0.496  |
| PFOA     | Total fat           | -0.09 (-0.142, -0.038)  | 0.001  | -0.082 (-0.142, -0.021) | 0.009  |
| PFOA     | Total folate        | -0.031 (-0.082, 0.019)  | 0.219  | -0.021 (-0.074, 0.032)  | 0.438  |
| PFOA     | Total MUFAs         | -0.094 (-0.151, -0.038) | 0.001  | -0.068 (-0.132, -0.003) | 0.041  |
| PFOA     | Total PUFAs         | -0.034 (-0.083, 0.015)  | 0.171  | -0.03 (-0.086, 0.027)   | 0.295  |
| PFOA     | Total SFAs          | -0.083 (-0.14, -0.026)  | 0.005  | -0.072 (-0.135, -0.009) | 0.025  |
| PFOA     | Vitamin A           | -0.04 (-0.085, 0.006)   | 0.086  | -0.036 (-0.087, 0.016)  | 0.174  |
| PFOA     | Vitamin B12         | -0.006 (-0.054, 0.042)  | 0.808  | -0.003 (-0.055, 0.048)  | 0.903  |
| PFOA     | Vitamin B6          | -0.035 (-0.086, 0.015)  | 0.169  | -0.033 (-0.09, 0.025)   | 0.259  |
| PFOA     | Vitamin C           | -0.008 (-0.048, 0.031)  | 0.674  | -0.007 (-0.057, 0.043)  | 0.781  |
| PFOA     | Vitamin D (D2 + D3) | -0.069 (-0.114, -0.024) | 0.003  | -0.068 (-0.12, -0.016)  | 0.011  |
| PFOA     | Vitamin E           | -0.058 (-0.106, -0.011) | 0.016  | -0.063 (-0.112, -0.015) | 0.011  |
| PFOA     | Zinc                | -0.048 (-0.102, 0.005)  | 0.076  | -0.039 (-0.101, 0.024)  | 0.219  |
| PFNA     | Alcohol             | 0.11 (0.055, 0.166)     | <0.001 | 0.094 (0.032, 0.155)    | 0.003  |
| PFNA     | Beta-carotene       | 0.014 (-0.034, 0.062)   | 0.563  | 0.001 (-0.056, 0.058)   | 0.973  |
| PFNA     | Carbohydrate        | -0.068 (-0.136, 0)      | 0.051  | -0.043 (-0.113, 0.028)  | 0.233  |
| PFNA     | Cholesterol         | 0.093 (0.039, 0.147)    | 0.001  | 0.104 (0.045, 0.162)    | 0.001  |
| PFNA     | Dietary fiber       | -0.156 (-0.215, -0.098) | <0.001 | -0.145 (-0.211, -0.078) | <0.001 |
| PFNA     | Energy              | -0.078 (-0.136, -0.02)  | 0.009  | -0.085 (-0.155, -0.015) | 0.017  |
| PFNA     | Iron                | -0.061 (-0.127, 0.004)  | 0.066  | -0.048 (-0.117, 0.021)  | 0.172  |
| PFNA     | Magnesium           | -0.081 (-0.146, -0.016) | 0.016  | -0.083 (-0.157, -0.009) | 0.028  |
| PFNA     | n-3 PUFAs           | 0.141 (0.084, 0.198)    | <0.001 | 0.124 (0.068, 0.18)     | <0.001 |
| PFNA     | n-6 PUFAs           | -0.028 (-0.086, 0.029)  | 0.329  | -0.018 (-0.089, 0.052)  | 0.605  |
| PFNA     | Niacin              | 0.055 (-0.006, 0.116)   | 0.078  | 0.045 (-0.025, 0.115)   | 0.204  |
| PFNA     | Protein             | 0.085 (0.012, 0.157)    | 0.022  | 0.095 (0.015, 0.175)    | 0.021  |
| PFNA     | Riboflavin          | -0.059 (-0.128, 0.009)  | 0.089  | -0.063 (-0.129, 0.002)  | 0.058  |
| PFNA     | Selenium            | 0.059 (-0.014, 0.131)   | 0.113  | 0.079 (-0.009, 0.167)   | 0.077  |
| PFNA     | Thiamin             | -0.032 (-0.099, 0.034)  | 0.339  | -0.03 (-0.097, 0.037)   | 0.38   |
| PFNA     | Total fat           | -0.074 (-0.138, -0.01)  | 0.024  | -0.073 (-0.155, 0.008)  | 0.078  |

|       |                     |                         |        |                         |        |
|-------|---------------------|-------------------------|--------|-------------------------|--------|
| PFNA  | Total folate        | -0.072 (-0.135, -0.009) | 0.026  | -0.066 (-0.14, 0.007)   | 0.076  |
| PFNA  | Total MUFAs         | -0.051 (-0.114, 0.011)  | 0.106  | -0.02 (-0.089, 0.049)   | 0.558  |
| PFNA  | Total PUFAs         | -0.019 (-0.077, 0.04)   | 0.521  | -0.005 (-0.071, 0.061)  | 0.876  |
| PFNA  | Total SFAs          | -0.093 (-0.16, -0.026)  | 0.007  | -0.097 (-0.172, -0.023) | 0.011  |
| PFNA  | Vitamin A           | -0.056 (-0.117, 0.005)  | 0.069  | -0.063 (-0.132, 0.007)  | 0.075  |
| PFNA  | Vitamin B12         | -0.002 (-0.056, 0.051)  | 0.927  | -0.006 (-0.067, 0.054)  | 0.832  |
| PFNA  | Vitamin B6          | -0.002 (-0.064, 0.06)   | 0.942  | -0.013 (-0.087, 0.062)  | 0.732  |
| PFNA  | Vitamin C           | 0.004 (-0.045, 0.054)   | 0.861  | 0.005 (-0.048, 0.057)   | 0.86   |
| PFNA  | Vitamin D (D2 + D3) | -0.066 (-0.12, -0.011)  | 0.019  | -0.079 (-0.139, -0.02)  | 0.009  |
| PFNA  | Vitamin E           | -0.023 (-0.082, 0.037)  | 0.453  | -0.016 (-0.084, 0.052)  | 0.644  |
| PFNA  | Zinc                | -0.056 (-0.125, 0.012)  | 0.104  | -0.055 (-0.129, 0.02)   | 0.15   |
| PFHxS | Alcohol             | 0.059 (-0.006, 0.123)   | 0.075  | 0.03 (-0.043, 0.102)    | 0.416  |
| PFHxS | Beta-carotene       | 0.042 (-0.014, 0.098)   | 0.137  | 0.043 (-0.019, 0.105)   | 0.172  |
| PFHxS | Carbohydrate        | -0.063 (-0.143, 0.018)  | 0.126  | 0.008 (-0.077, 0.093)   | 0.851  |
| PFHxS | Cholesterol         | -0.038 (-0.097, 0.022)  | 0.21   | -0.027 (-0.1, 0.045)    | 0.453  |
| PFHxS | Dietary fiber       | -0.039 (-0.098, 0.02)   | 0.192  | -0.011 (-0.079, 0.056)  | 0.74   |
| PFHxS | Energy              | -0.099 (-0.177, -0.022) | 0.013  | -0.068 (-0.161, 0.025)  | 0.148  |
| PFHxS | Iron                | -0.036 (-0.102, 0.03)   | 0.278  | -0.026 (-0.099, 0.047)  | 0.476  |
| PFHxS | Magnesium           | -0.02 (-0.083, 0.042)   | 0.517  | -0.002 (-0.078, 0.074)  | 0.959  |
| PFHxS | n-3 PUFAs           | 0.017 (-0.045, 0.079)   | 0.589  | -0.002 (-0.066, 0.062)  | 0.946  |
| PFHxS | n-6 PUFAs           | -0.001 (-0.068, 0.067)  | 0.986  | 0.022 (-0.049, 0.093)   | 0.543  |
| PFHxS | Niacin              | 0.045 (-0.022, 0.111)   | 0.185  | 0.037 (-0.039, 0.113)   | 0.333  |
| PFHxS | Protein             | 0.04 (-0.032, 0.111)    | 0.272  | 0.046 (-0.037, 0.128)   | 0.273  |
| PFHxS | Riboflavin          | 0.017 (-0.042, 0.076)   | 0.562  | 0.006 (-0.062, 0.074)   | 0.86   |
| PFHxS | Selenium            | 0.003 (-0.076, 0.082)   | 0.937  | 0.037 (-0.052, 0.126)   | 0.406  |
| PFHxS | Thiamin             | -0.018 (-0.094, 0.058)  | 0.636  | -0.022 (-0.102, 0.058)  | 0.586  |
| PFHxS | Total fat           | -0.151 (-0.224, -0.079) | <0.001 | -0.088 (-0.17, -0.006)  | 0.036  |
| PFHxS | Total folate        | -0.007 (-0.074, 0.059)  | 0.828  | 0.002 (-0.066, 0.07)    | 0.946  |
| PFHxS | Total MUFAs         | -0.104 (-0.174, -0.033) | 0.005  | -0.056 (-0.141, 0.029)  | 0.197  |
| PFHxS | Total PUFAs         | 0.002 (-0.065, 0.07)    | 0.946  | 0.036 (-0.036, 0.108)   | 0.32   |
| PFHxS | Total SFAs          | -0.155 (-0.227, -0.083) | <0.001 | -0.123 (-0.204, -0.043) | 0.003  |
| PFHxS | Vitamin A           | -0.009 (-0.065, 0.046)  | 0.743  | -0.02 (-0.084, 0.044)   | 0.539  |
| PFHxS | Vitamin B12         | 0.021 (-0.04, 0.082)    | 0.49   | 0.01 (-0.059, 0.08)     | 0.769  |
| PFHxS | Vitamin B6          | 0.002 (-0.063, 0.066)   | 0.961  | -0.011 (-0.087, 0.065)  | 0.768  |
| PFHxS | Vitamin C           | 0.054 (0, 0.108)        | 0.05   | 0.07 (0.009, 0.132)     | 0.026  |
| PFHxS | Vitamin D (D2 + D3) | -0.052 (-0.107, 0.003)  | 0.063  | -0.069 (-0.137, -0.002) | 0.044  |
| PFHxS | Vitamin E           | -0.012 (-0.069, 0.045)  | 0.674  | -0.004 (-0.07, 0.062)   | 0.9    |
| PFHxS | Zinc                | 0.006 (-0.066, 0.079)   | 0.859  | -0.006 (-0.074, 0.061)  | 0.855  |
| PFDA  | Alcohol             | 0.119 (0.057, 0.182)    | <0.001 | 0.089 (0.017, 0.161)    | 0.016  |
| PFDA  | Beta-carotene       | 0.094 (0.045, 0.143)    | <0.001 | 0.072 (0.016, 0.127)    | 0.012  |
| PFDA  | Carbohydrate        | -0.139 (-0.206, -0.072) | <0.001 | -0.109 (-0.187, -0.031) | 0.007  |
| PFDA  | Cholesterol         | 0.121 (0.066, 0.177)    | <0.001 | 0.114 (0.048, 0.18)     | 0.001  |
| PFDA  | Dietary fiber       | -0.066 (-0.118, -0.014) | 0.013  | -0.067 (-0.123, -0.01)  | 0.021  |
| PFDA  | Energy              | -0.078 (-0.136, -0.02)  | 0.009  | -0.1 (-0.17, -0.031)    | 0.005  |
| PFDA  | Iron                | -0.075 (-0.136, -0.013) | 0.018  | -0.062 (-0.129, 0.006)  | 0.072  |
| PFDA  | Magnesium           | -0.008 (-0.072, 0.057)  | 0.812  | -0.009 (-0.081, 0.064)  | 0.81   |
| PFDA  | n-3 PUFAs           | 0.187 (0.133, 0.241)    | <0.001 | 0.176 (0.123, 0.228)    | <0.001 |
| PFDA  | n-6 PUFAs           | -0.026 (-0.087, 0.035)  | 0.397  | -0.016 (-0.084, 0.052)  | 0.647  |
| PFDA  | Niacin              | 0.068 (-0.001, 0.138)   | 0.052  | 0.066 (-0.01, 0.142)    | 0.087  |
| PFDA  | Protein             | 0.093 (0.025, 0.161)    | 0.008  | 0.12 (0.046, 0.194)     | 0.002  |
| PFDA  | Riboflavin          | -0.064 (-0.131, 0.003)  | 0.061  | -0.038 (-0.106, 0.03)   | 0.273  |
| PFDA  | Selenium            | 0.083 (0.01, 0.155)     | 0.026  | 0.085 (0.004, 0.166)    | 0.04   |
| PFDA  | Thiamin             | -0.03 (-0.09, 0.031)    | 0.335  | -0.027 (-0.09, 0.037)   | 0.406  |
| PFDA  | Total fat           | -0.047 (-0.118, 0.025)  | 0.198  | -0.037 (-0.116, 0.042)  | 0.358  |
| PFDA  | Total folate        | -0.06 (-0.122, 0.003)   | 0.062  | -0.062 (-0.129, 0.004)  | 0.066  |
| PFDA  | Total MUFAs         | -0.026 (-0.091, 0.039)  | 0.425  | -0.008 (-0.076, 0.06)   | 0.816  |
| PFDA  | Total PUFAs         | -0.016 (-0.08, 0.047)   | 0.612  | -0.005 (-0.072, 0.063)  | 0.892  |
| PFDA  | Total SFAs          | -0.07 (-0.134, -0.006)  | 0.032  | -0.068 (-0.139, 0.003)  | 0.061  |
| PFDA  | Vitamin A           | -0.05 (-0.106, 0.006)   | 0.08   | -0.045 (-0.107, 0.018)  | 0.16   |
| PFDA  | Vitamin B12         | 0.01 (-0.043, 0.062)    | 0.719  | 0.026 (-0.035, 0.086)   | 0.405  |
| PFDA  | Vitamin B6          | 0.025 (-0.037, 0.087)   | 0.419  | 0.028 (-0.042, 0.098)   | 0.427  |
| PFDA  | Vitamin C           | 0.01 (-0.034, 0.054)    | 0.649  | -0.009 (-0.057, 0.04)   | 0.726  |
| PFDA  | Vitamin D (D2 + D3) | -0.051 (-0.1, -0.002)   | 0.043  | -0.059 (-0.113, -0.005) | 0.034  |
| PFDA  | Vitamin E           | -0.055 (-0.113, 0.003)  | 0.063  | -0.063 (-0.128, 0.002)  | 0.058  |
| PFDA  | Zinc                | -0.011 (-0.068, 0.047)  | 0.715  | 0.009 (-0.059, 0.077)   | 0.79   |

Model 1 was adjusted for survey cycle, sex, age, race/ethnicity, education level, smoking status, BMI, serum cotinine.

Model 2 was adjusted for survey cycle, sex, age, race/ethnicity, education level, smoking status, BMI, serum cotinine, PIR, alcohol consumption.

Abbreviations: PFAS, perfluoroalkyl and polyfluoroalkyl substances; PFOA, perfluorooctanoic acid; PFNA, perfluorononanoic acid; PFOS, perfluorooctane sulfonic acid; PFDA, perfluorodecanoic acid; PFHxS, perfluorohexane sulfonic acid; DII, dietary inflammatory index; BMI, body mass index; PIR, poverty income ratio; CI, confidence interval.

28  
29  
30  
31

Table S2: Summary table for interaction analysis

|          | NC  | TBIL | ALP | Serum iron |
|----------|-----|------|-----|------------|
| PFDA     |     | +    |     | ++*        |
| PFHxS    | ++  |      |     |            |
| PFNA     | ++* | +    |     | ++         |
| PFOA     |     |      |     | ++         |
| PFOS     | ++  |      | ++  |            |
| Sum-PFAS | ++  |      | ++  |            |

++\*: implying the existence of a trend towards a greater effect of PFAS on the marker at higher DII, but the interaction P value more than 0.05;  
 ++\*: implying the presence of a significant greater effect of PFAS at higher DII levels on the marker;  
 ++\*: implying a significant interaction between PFAS and DII for this index, but the exact interaction is difficult to summarize.

32  
 33  
 34  
 35  
 36  
 37  
 38

Figure S1:

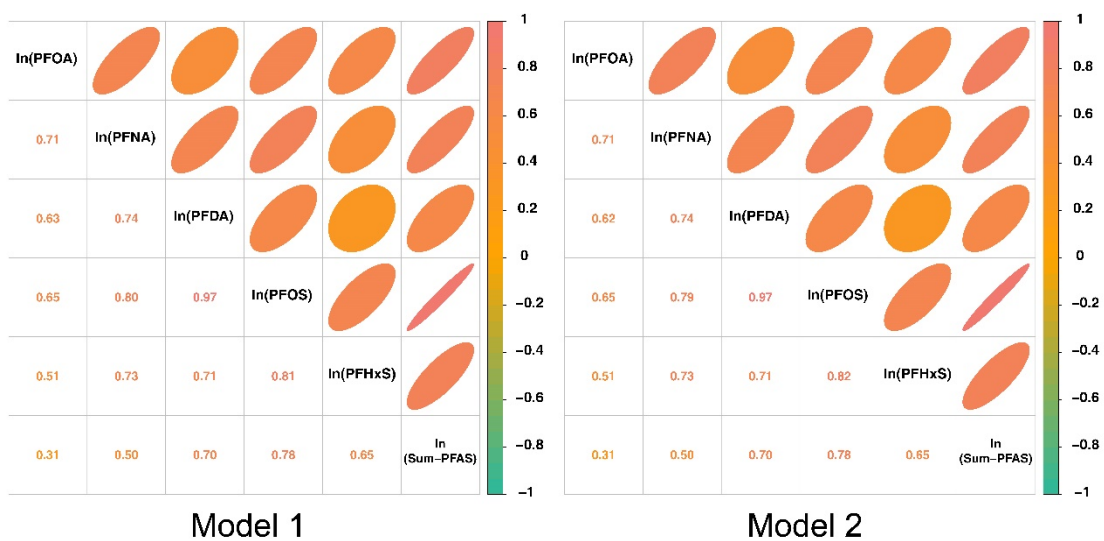

39  
 40  
 41  
 42

43

44 **Figure S2:**

45

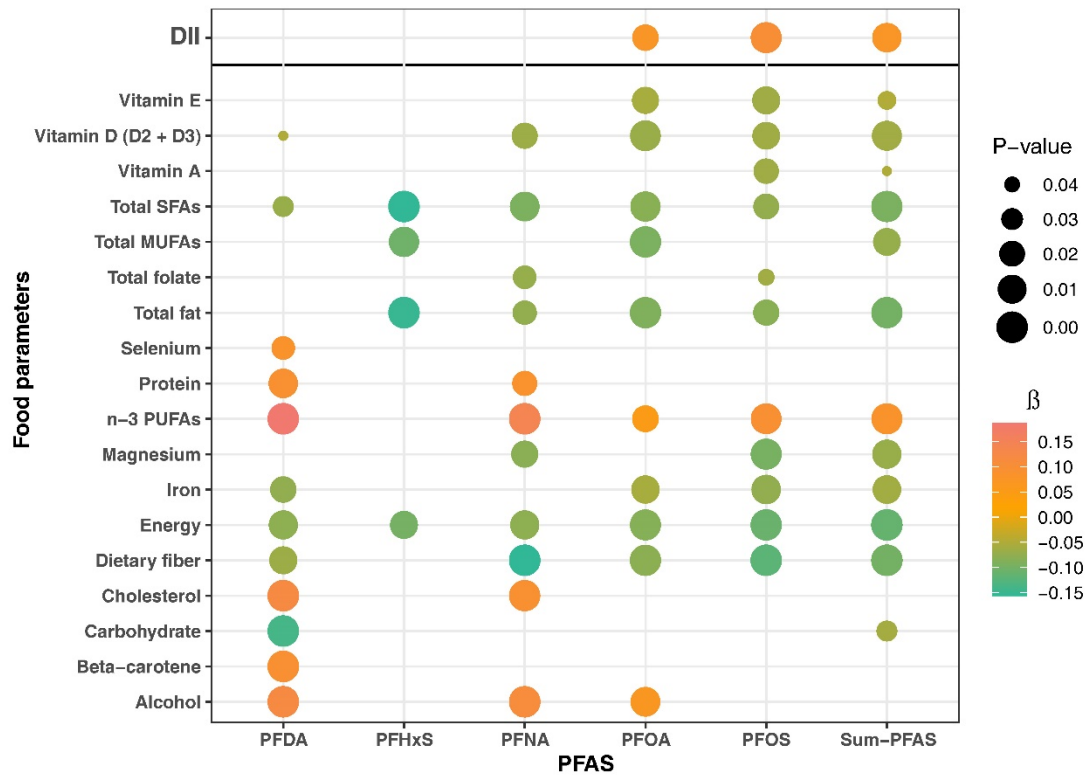

46

47

48

49 **Figure S3:**

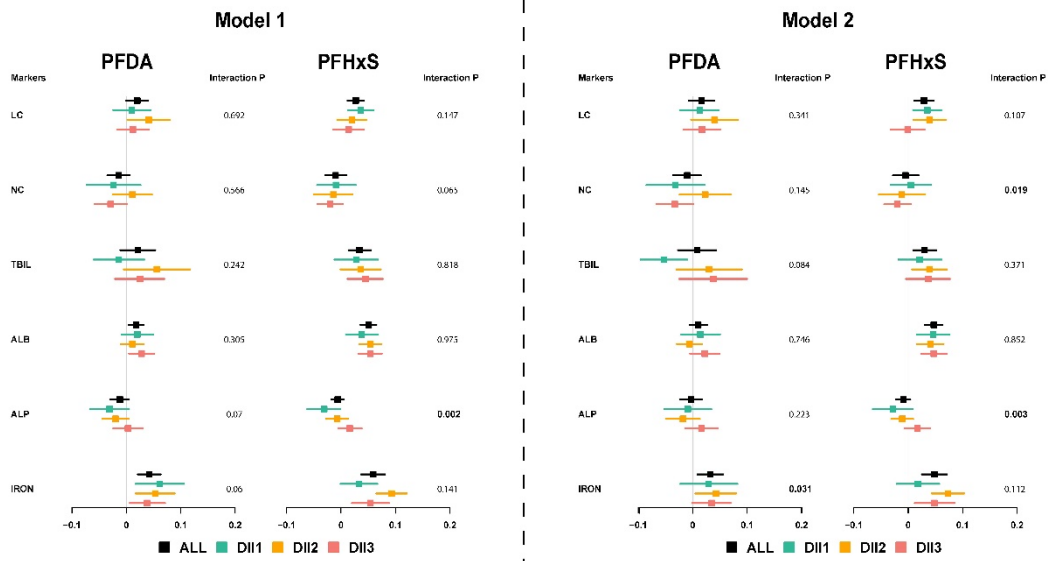

50

51

52 **Figure S4:**

53

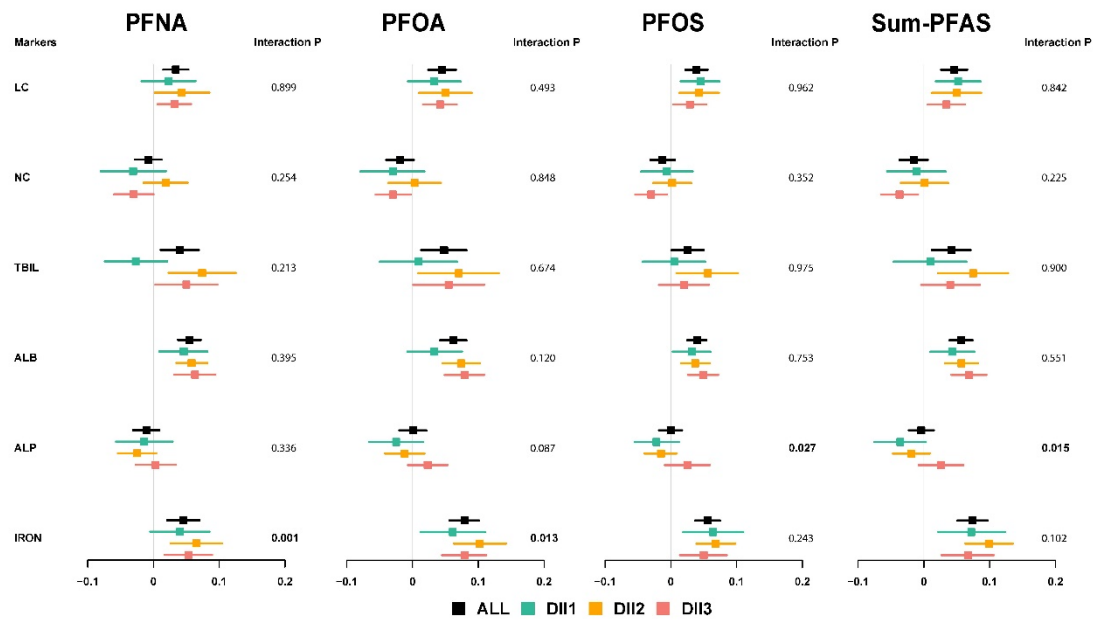

54

55

56

57

58

59

60

61

62

63 **Figure S5:**

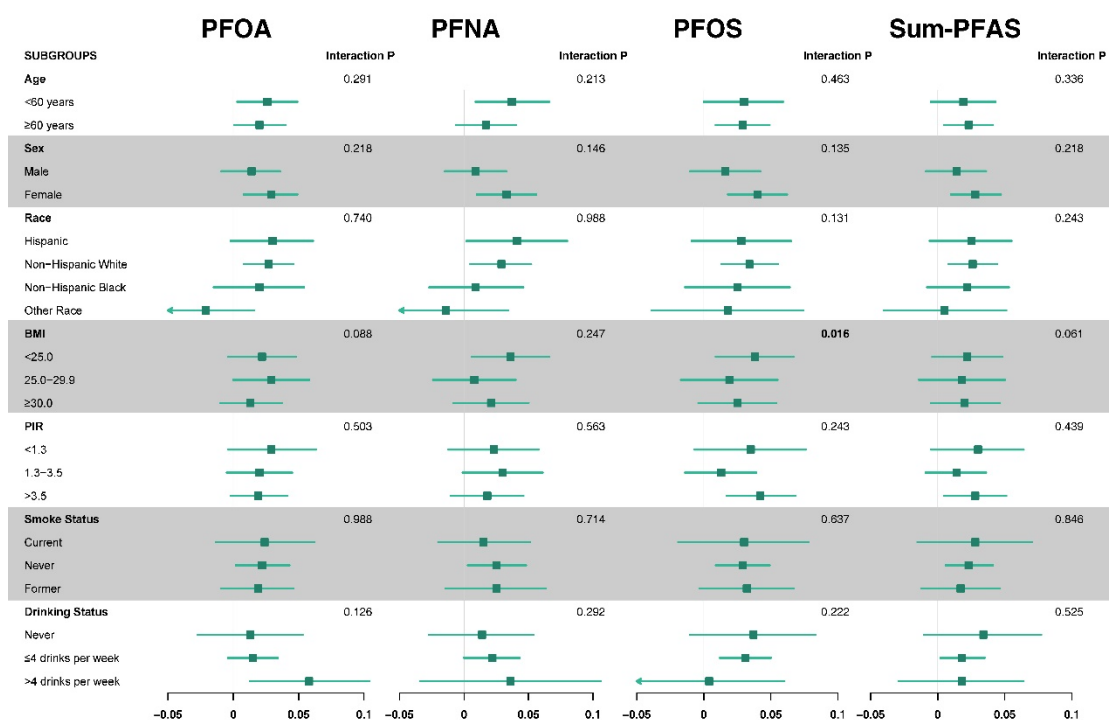

64

65

66 **Figure Legends:**

67 **Figure S1:** Pairwise pearson correlations between serum PFAS concentrations.

68 **Figure S2:** Association between blood PFAS and food parameters used for DII in Model 1. Each food  
 69 parameter was split into dichotomous variables based on the median. For DII, the results are shown for  
 70 T1 vs T3. Model was adjusted for survey cycle, sex, age, race/ethnicity, education level, smoking status,  
 71 BMI, and serum cotinine.

72 **Figure S3:** Relationship between PFHxS, PFDA and lymphocyte counts, neutrophil counts, total serum  
 73 bilirubin, and serum albumin with different levels of DII. Model 1 was adjusted for survey cycle, sex,  
 74 age, race/ethnicity, education level, smoking status, BMI, serum cotinine; Model was adjusted  
 75 covariates in model 1 and added PIR, and alcohol consumption.

76 CI, confidence interval; PFAS, Perfluoroalkyl and polyfluoroalkyl substances; PFHxS,  
 77 Perfluorohexane sulfonic acid; PFDA, Perfluorodecanoic acid. DII, Dietary inflammatory index; LC,  
 78 lymphocyte counts; NC, neutrophil counts; TBIL, total serum bilirubin; ALB, serum albumin; ALP,  
 79 alkaline phosphatase; BMI, Body mass index; PIR, Poverty income ratio.

80 **Figure S4:** Relationship between PFAS and lymphocyte counts, neutrophil counts, total serum  
 81 bilirubin, and serum albumin with different levels of DII in **Model 1**. Model was adjusted for survey  
 82 cycle, sex, age, race/ethnicity, education level, smoking status, BMI, and serum cotinine.

83 CI, confidence interval; PFAS, Perfluoroalkyl and polyfluoroalkyl substances; PFOA,  
 84 Perfluorooctanoic acid; PFNA, Perfluorononanoic acid; PFOS, Perfluorooctane sulfonic acid; DII,  
 85 Dietary inflammatory index; LC, lymphocyte counts; NC, neutrophil counts; TBIL, total serum  
 86 bilirubin; ALB, serum albumin; ALP, alkaline phosphatase; BMI, Body mass index; PIR, Poverty  
 87 income ratio.

88 **Figure S5:** Relationship between PFAS and DII in different subgroups in **Model 1**. Model was  
89 adjusted for survey cycle, sex, age, race/ethnicity, education level, smoking status, BMI, and serum  
90 cotinine. The variable used to split the data were not adjusted. CI, confidence interval; PFAS,  
91 Perfluoroalkyl and polyfluoroalkyl substances; PFOA, Perfluorooctanoic acid; PFNA,  
92 Perfluorononanoic acid; PFOS, Perfluorooctane sulfonic acid; DII, Dietary inflammatory index; BMI,  
93 Body mass index; PIR, Poverty income ratio.  
94
