# Supplementary figures and images for: Association between the dietary inflammatory index and serum perfluoroalkyl and polyfluoroalkyl substance concentrations: evidence from NANHES 2007–2018
Source: Royal Society of Chemistry journal article supplement (doi:10.1039/d3fo01487h), 2023-10-02

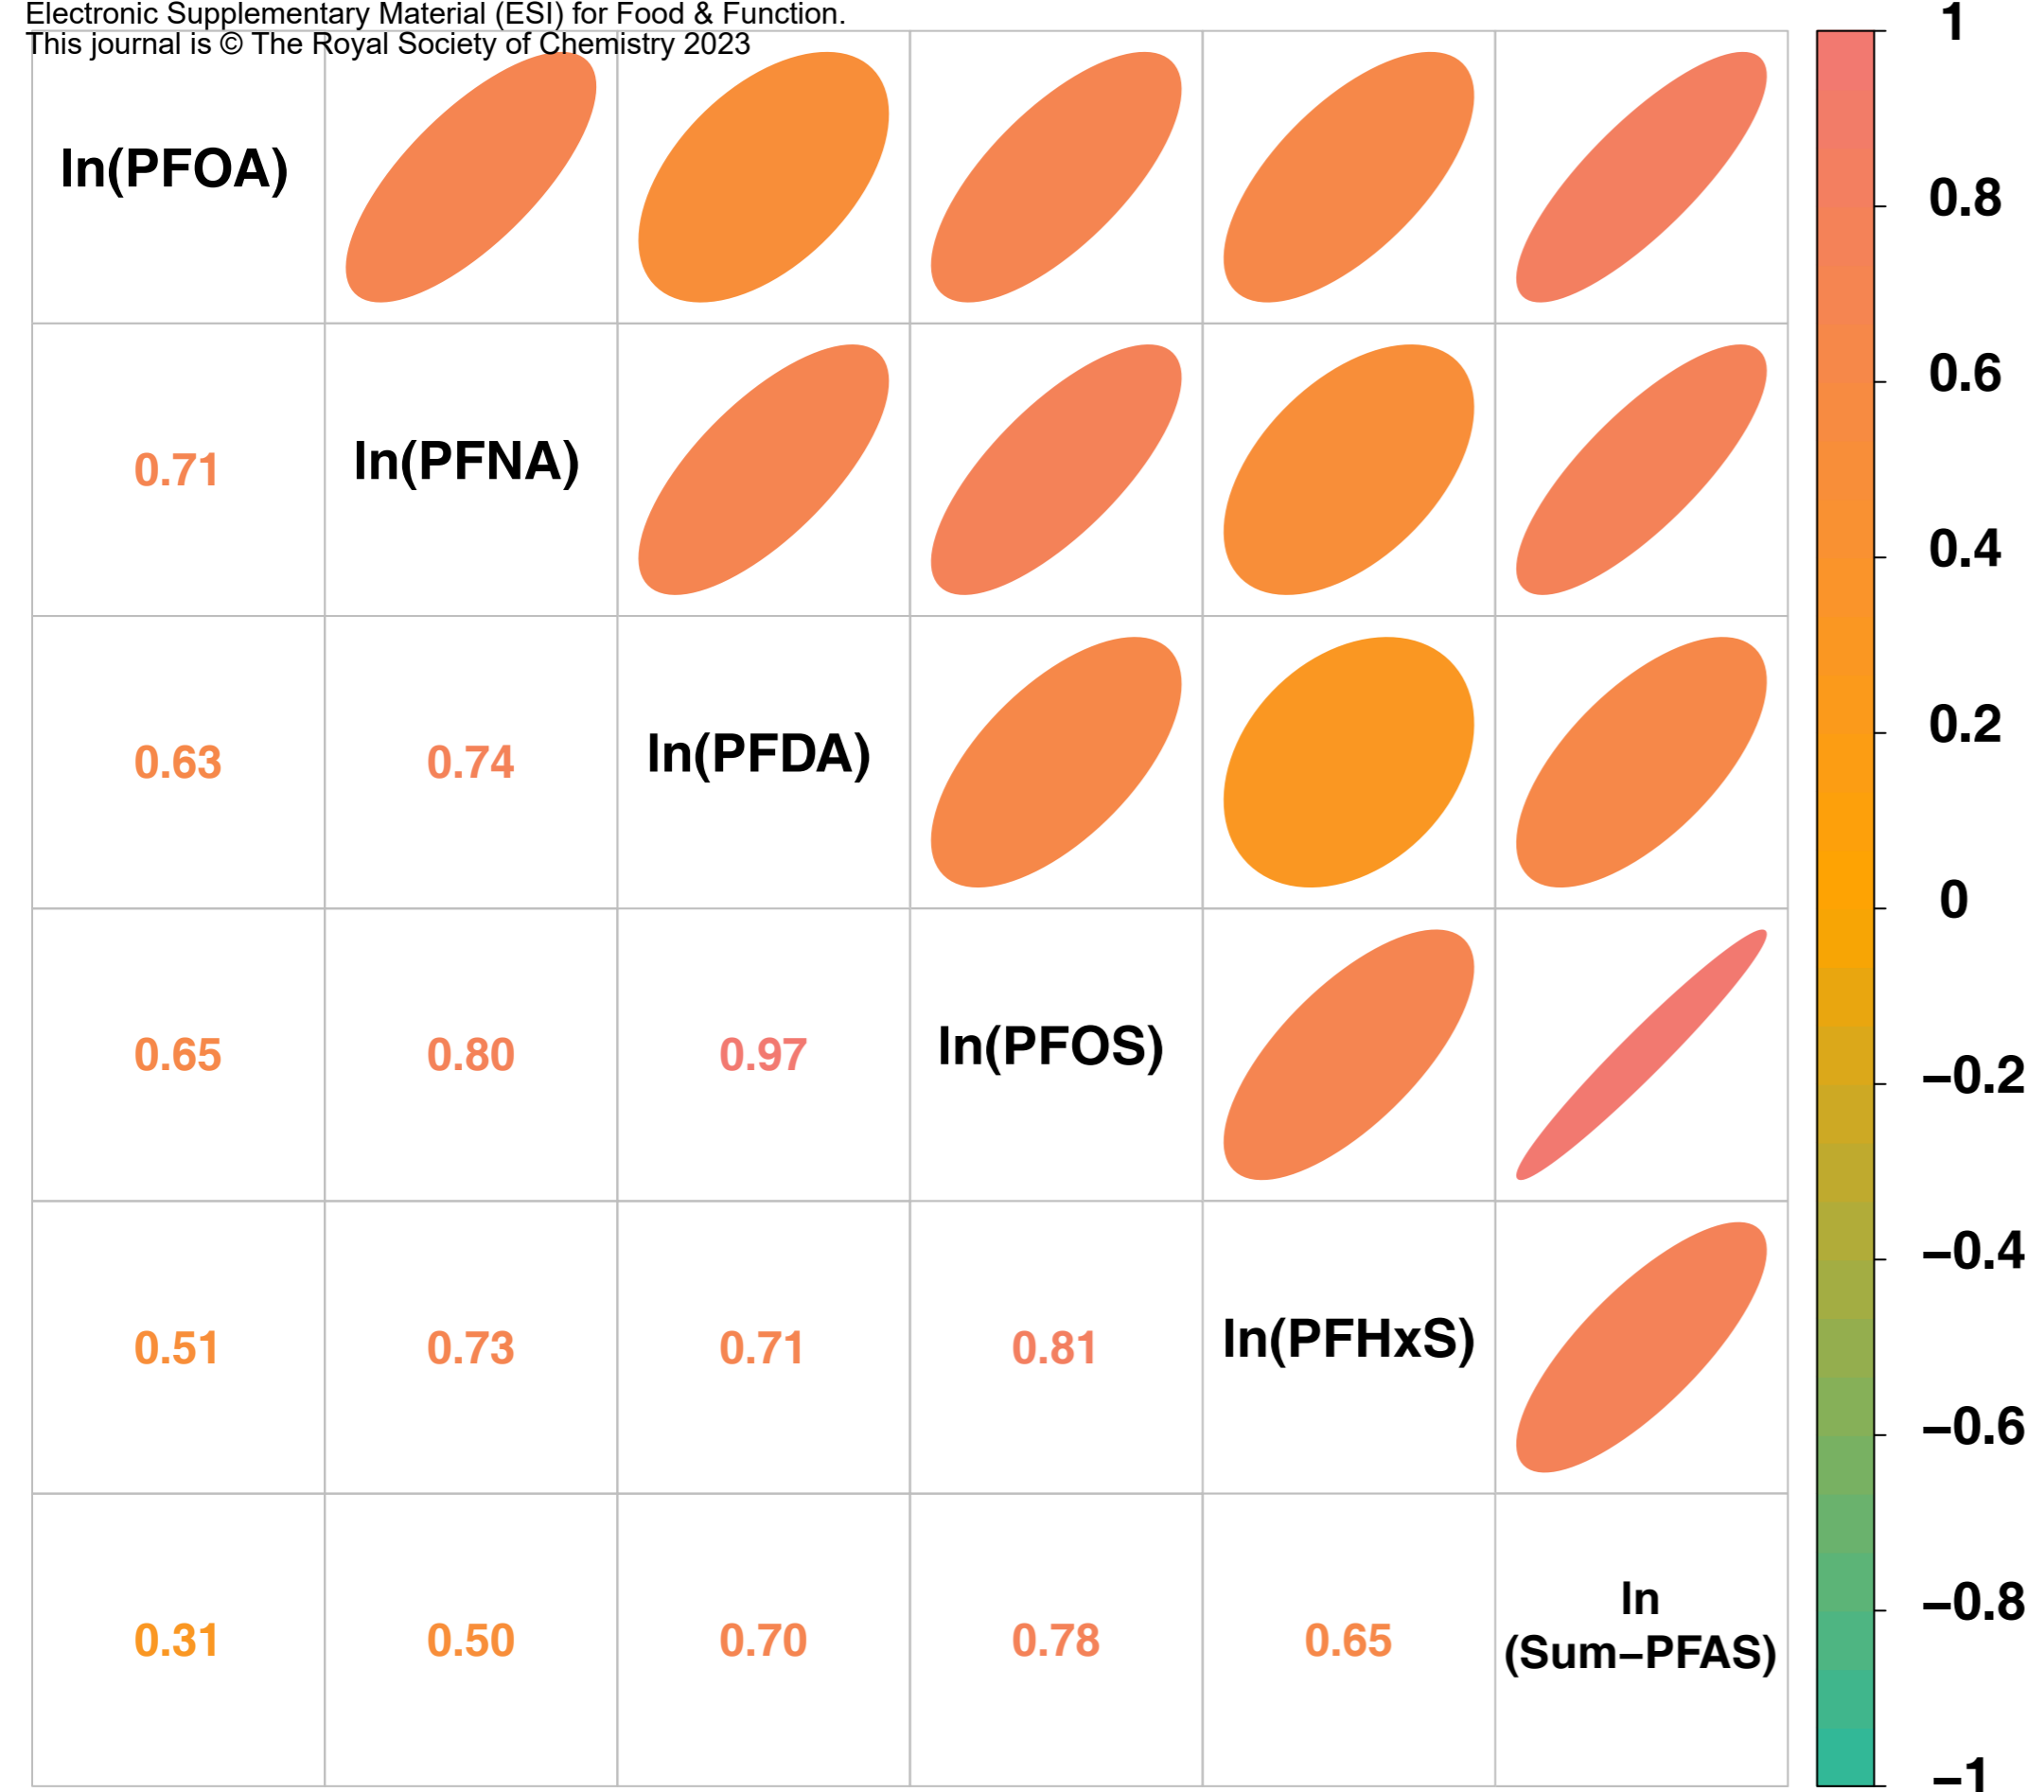

Model 1

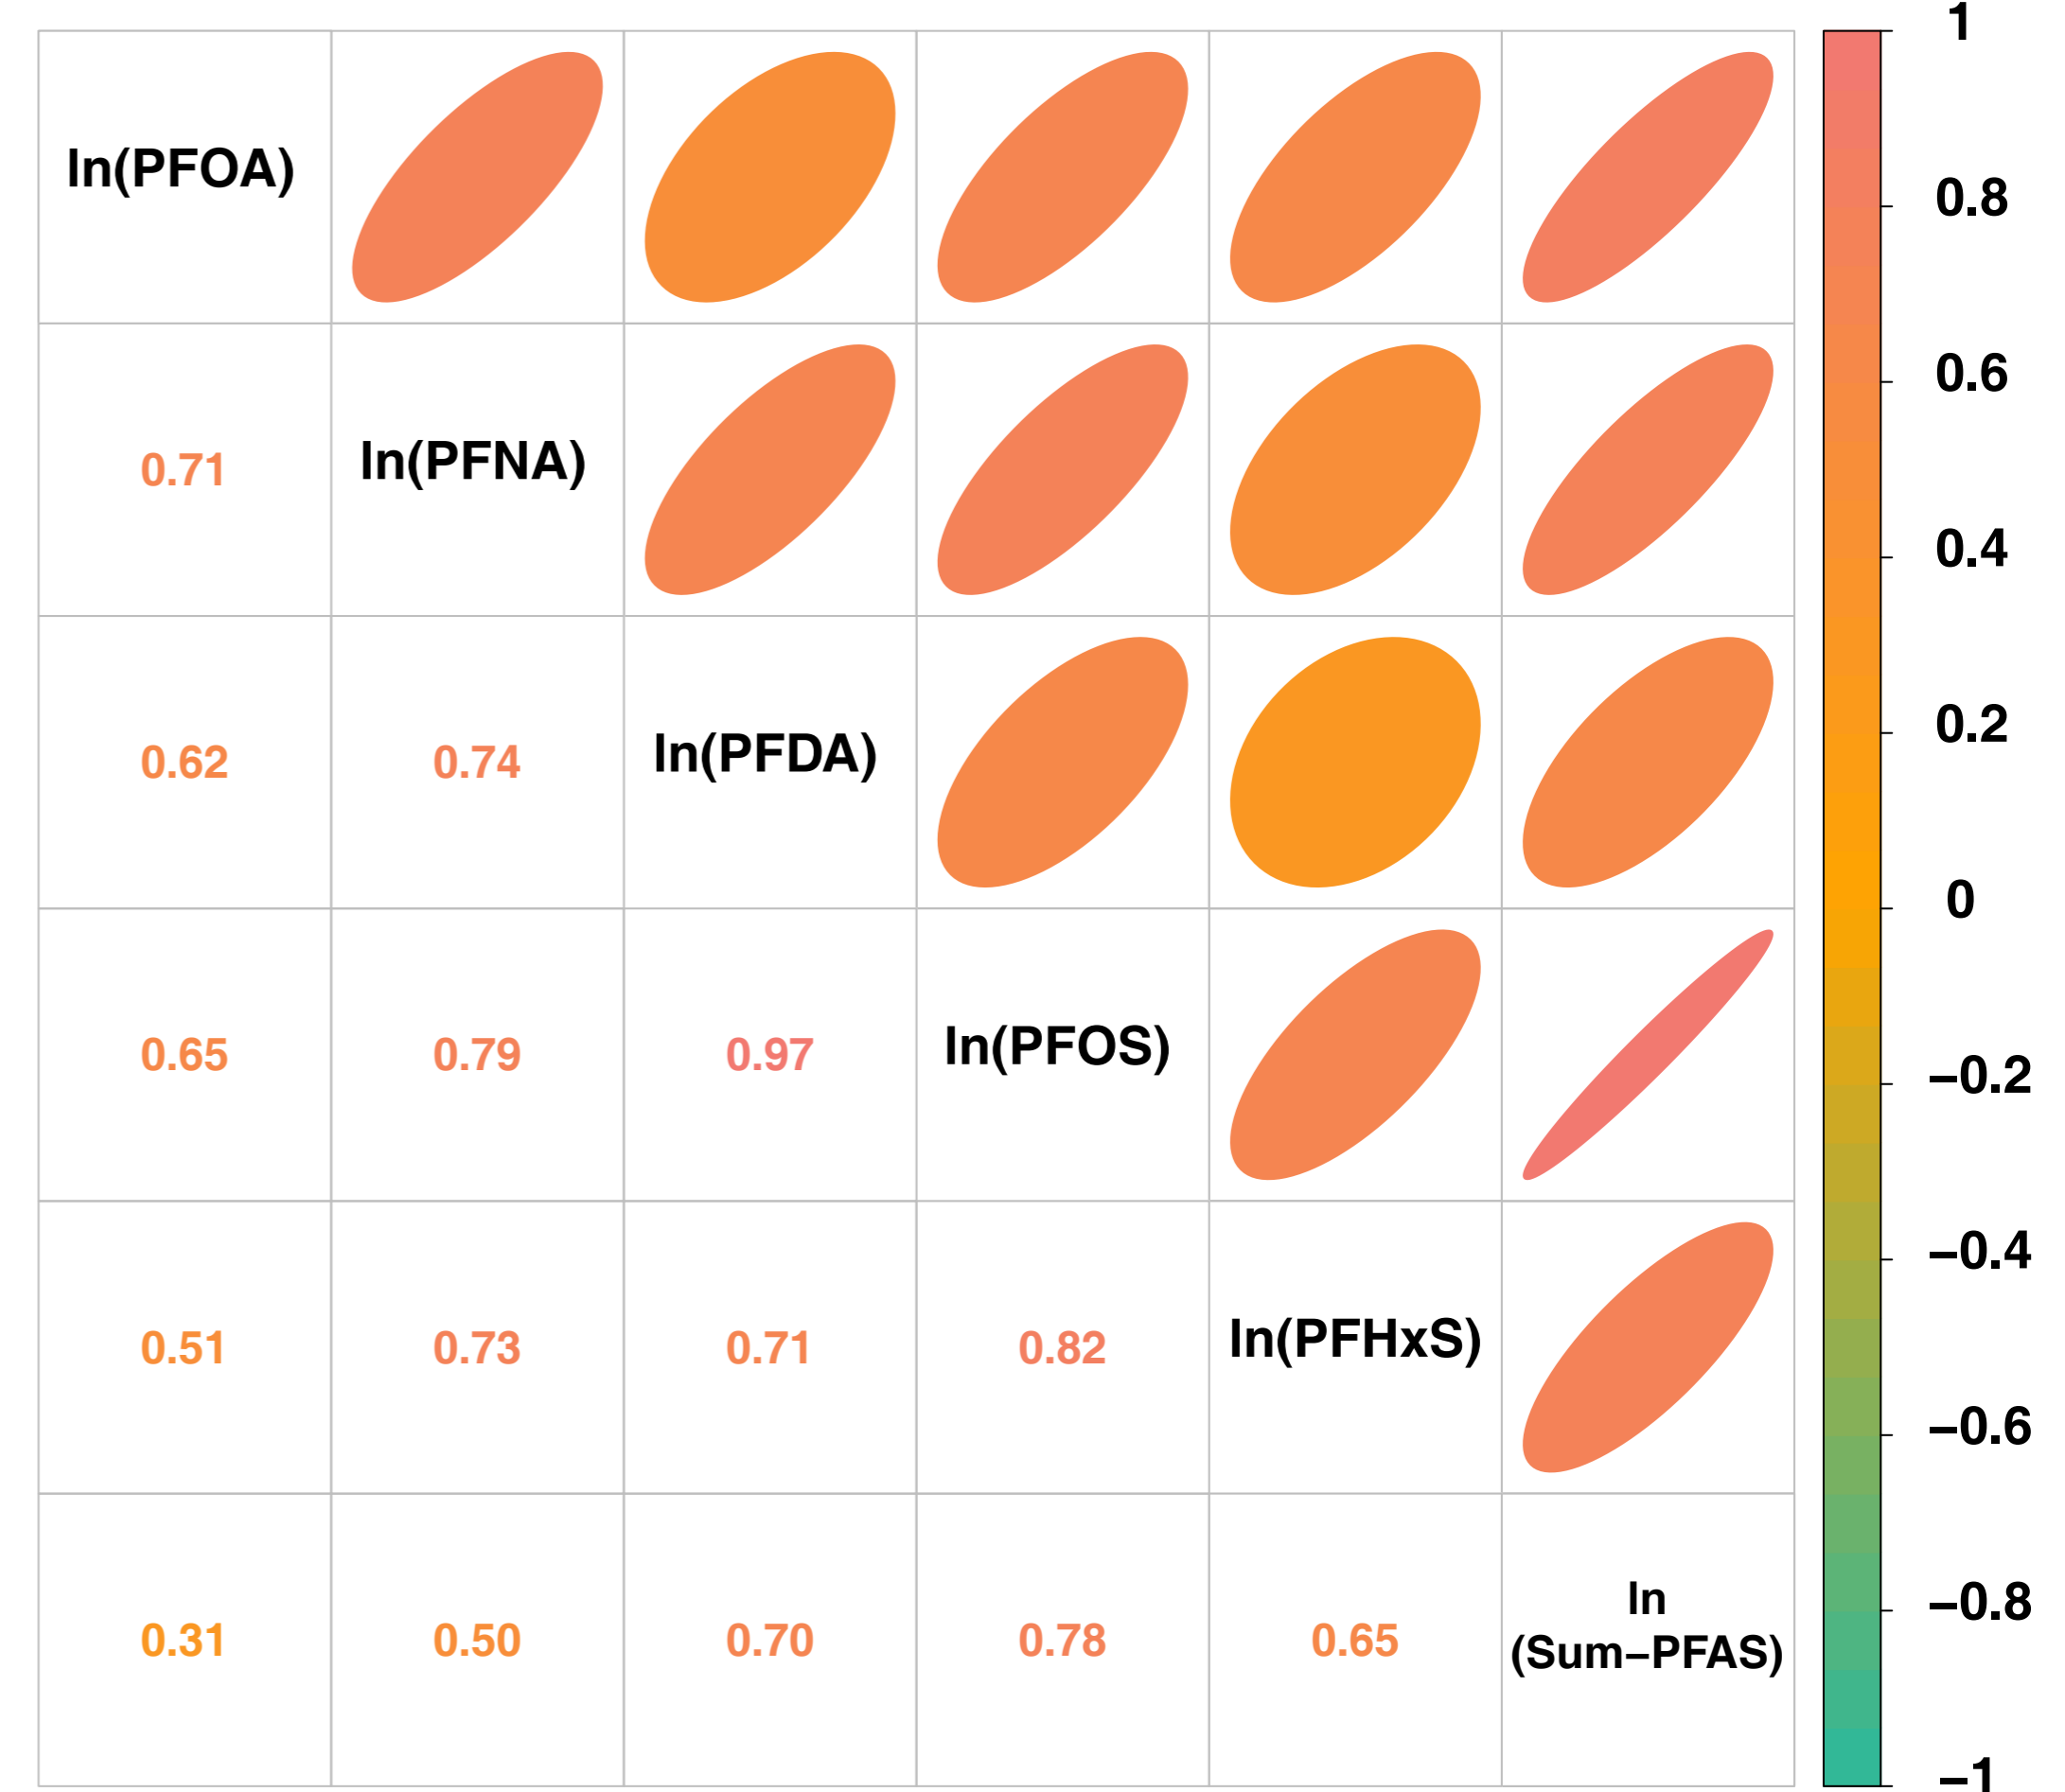

Model 2

Supplement: d3fo01487h2.pdf [file d3fo01487h2.pdf]

Food parameters

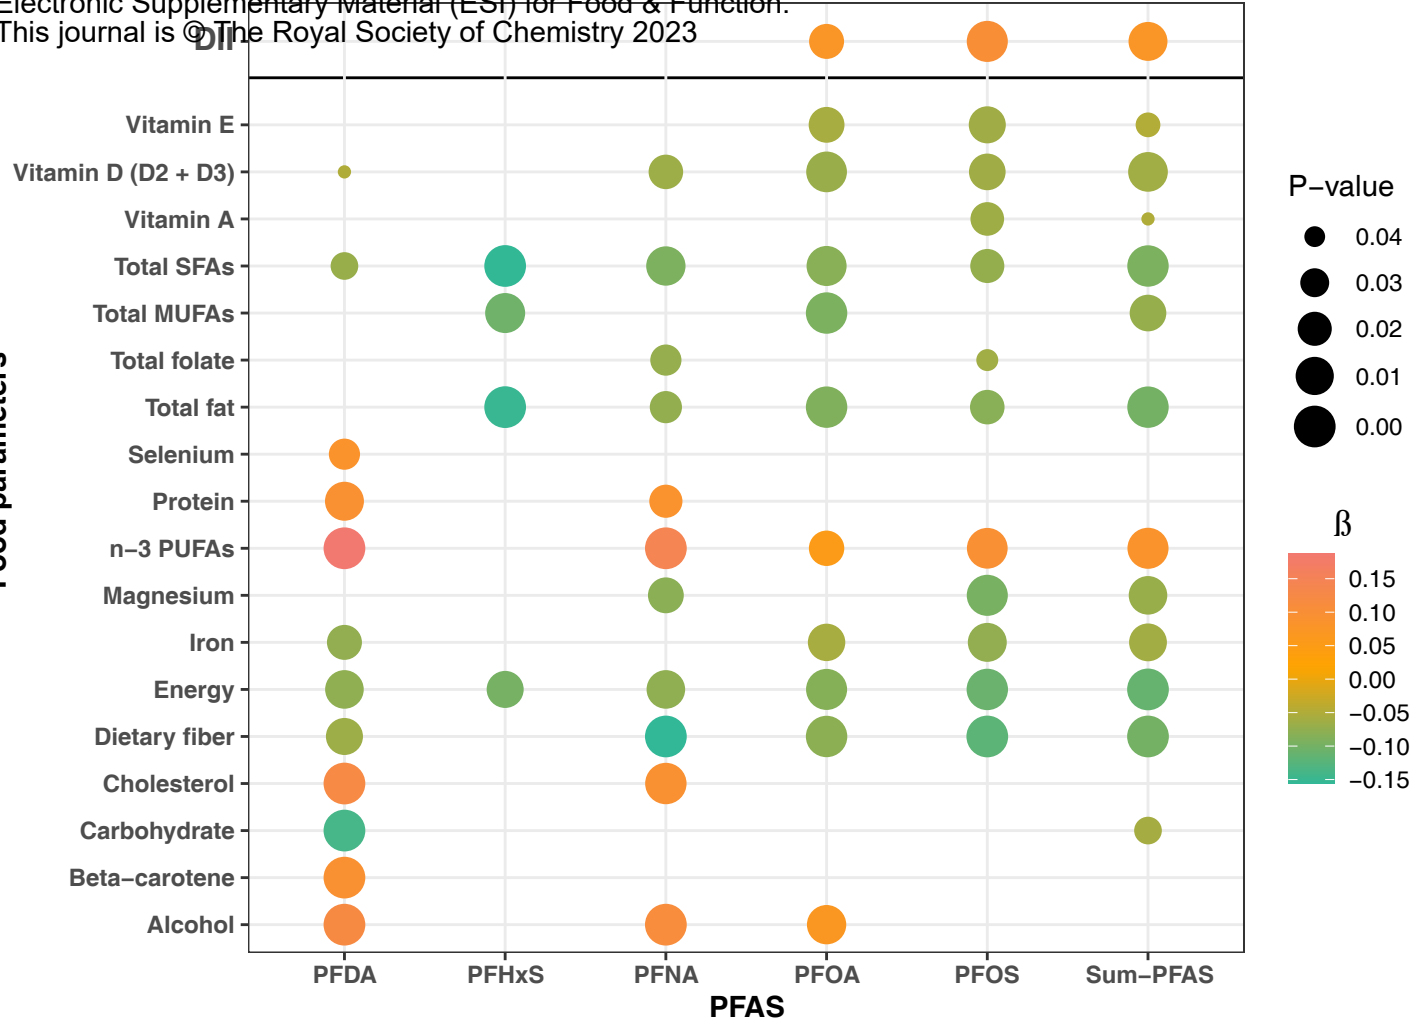

Supplement: d3fo01487h3.pdf [file d3fo01487h3.pdf]

### Model 1

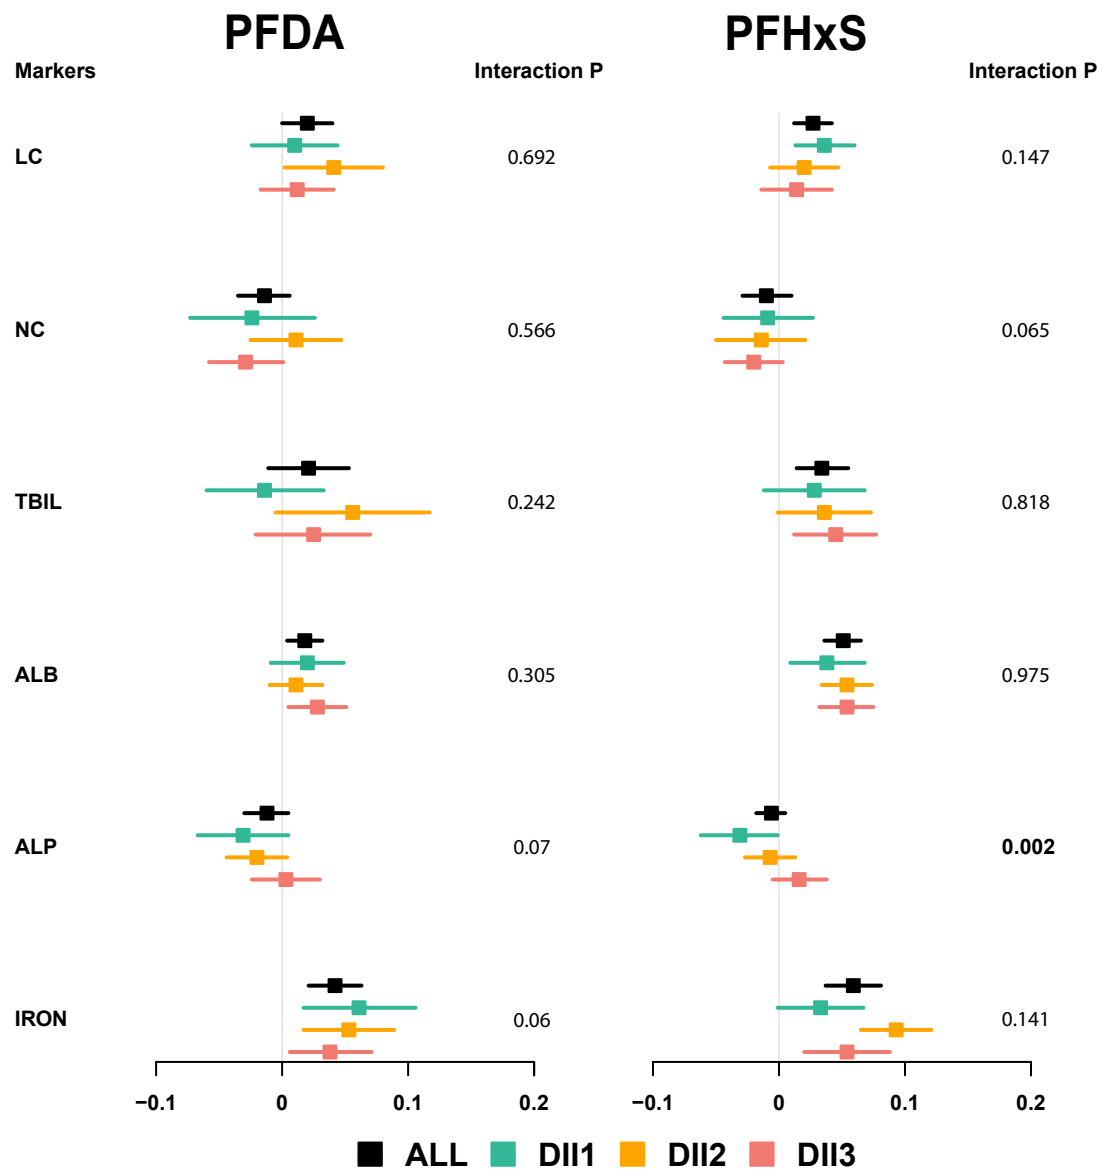

### Model 2

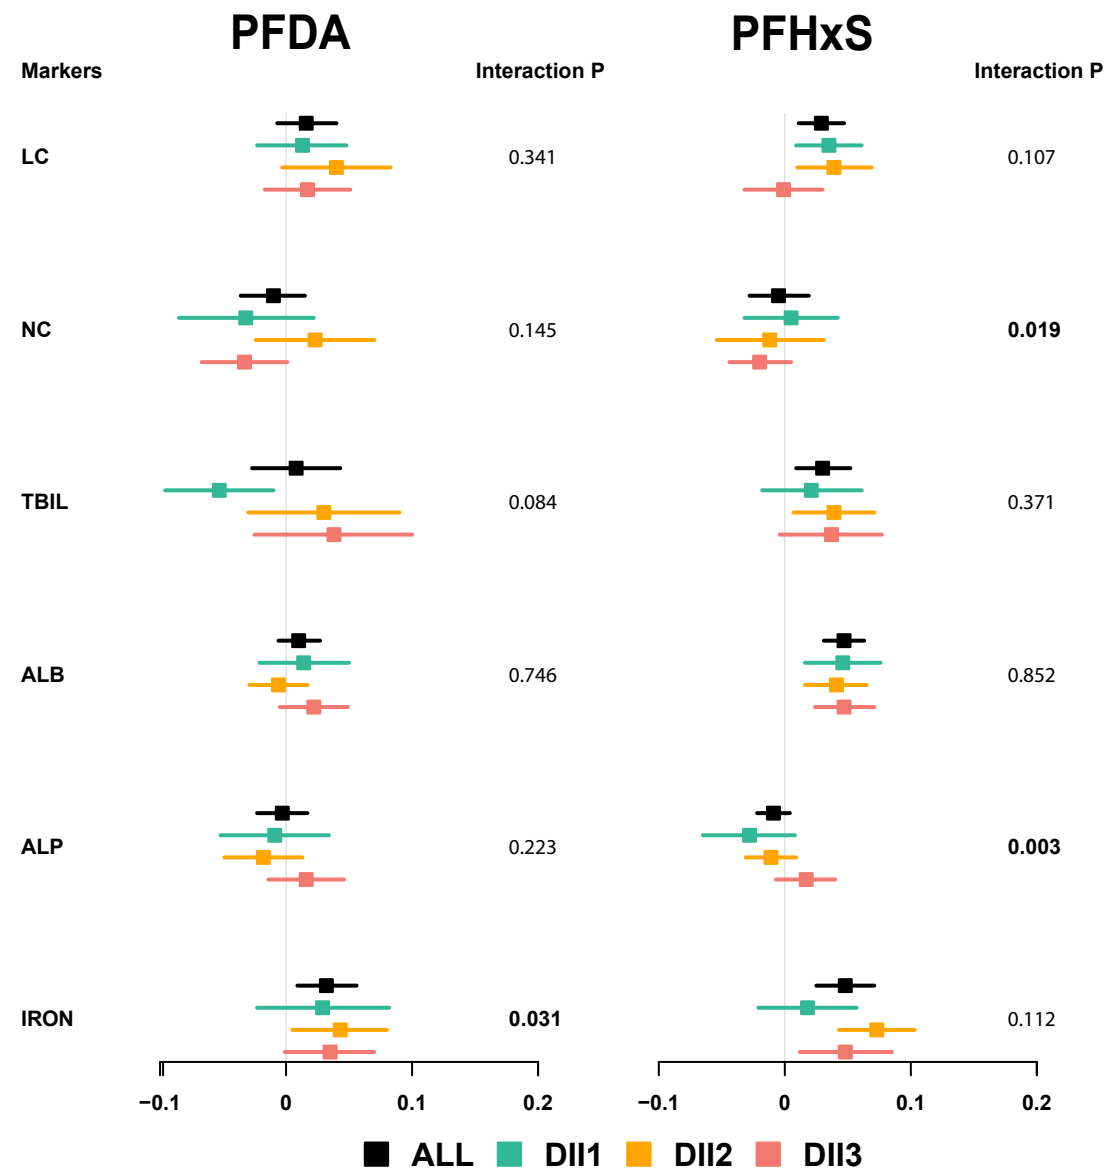

Supplement: d3fo01487h4.pdf [file d3fo01487h4.pdf]

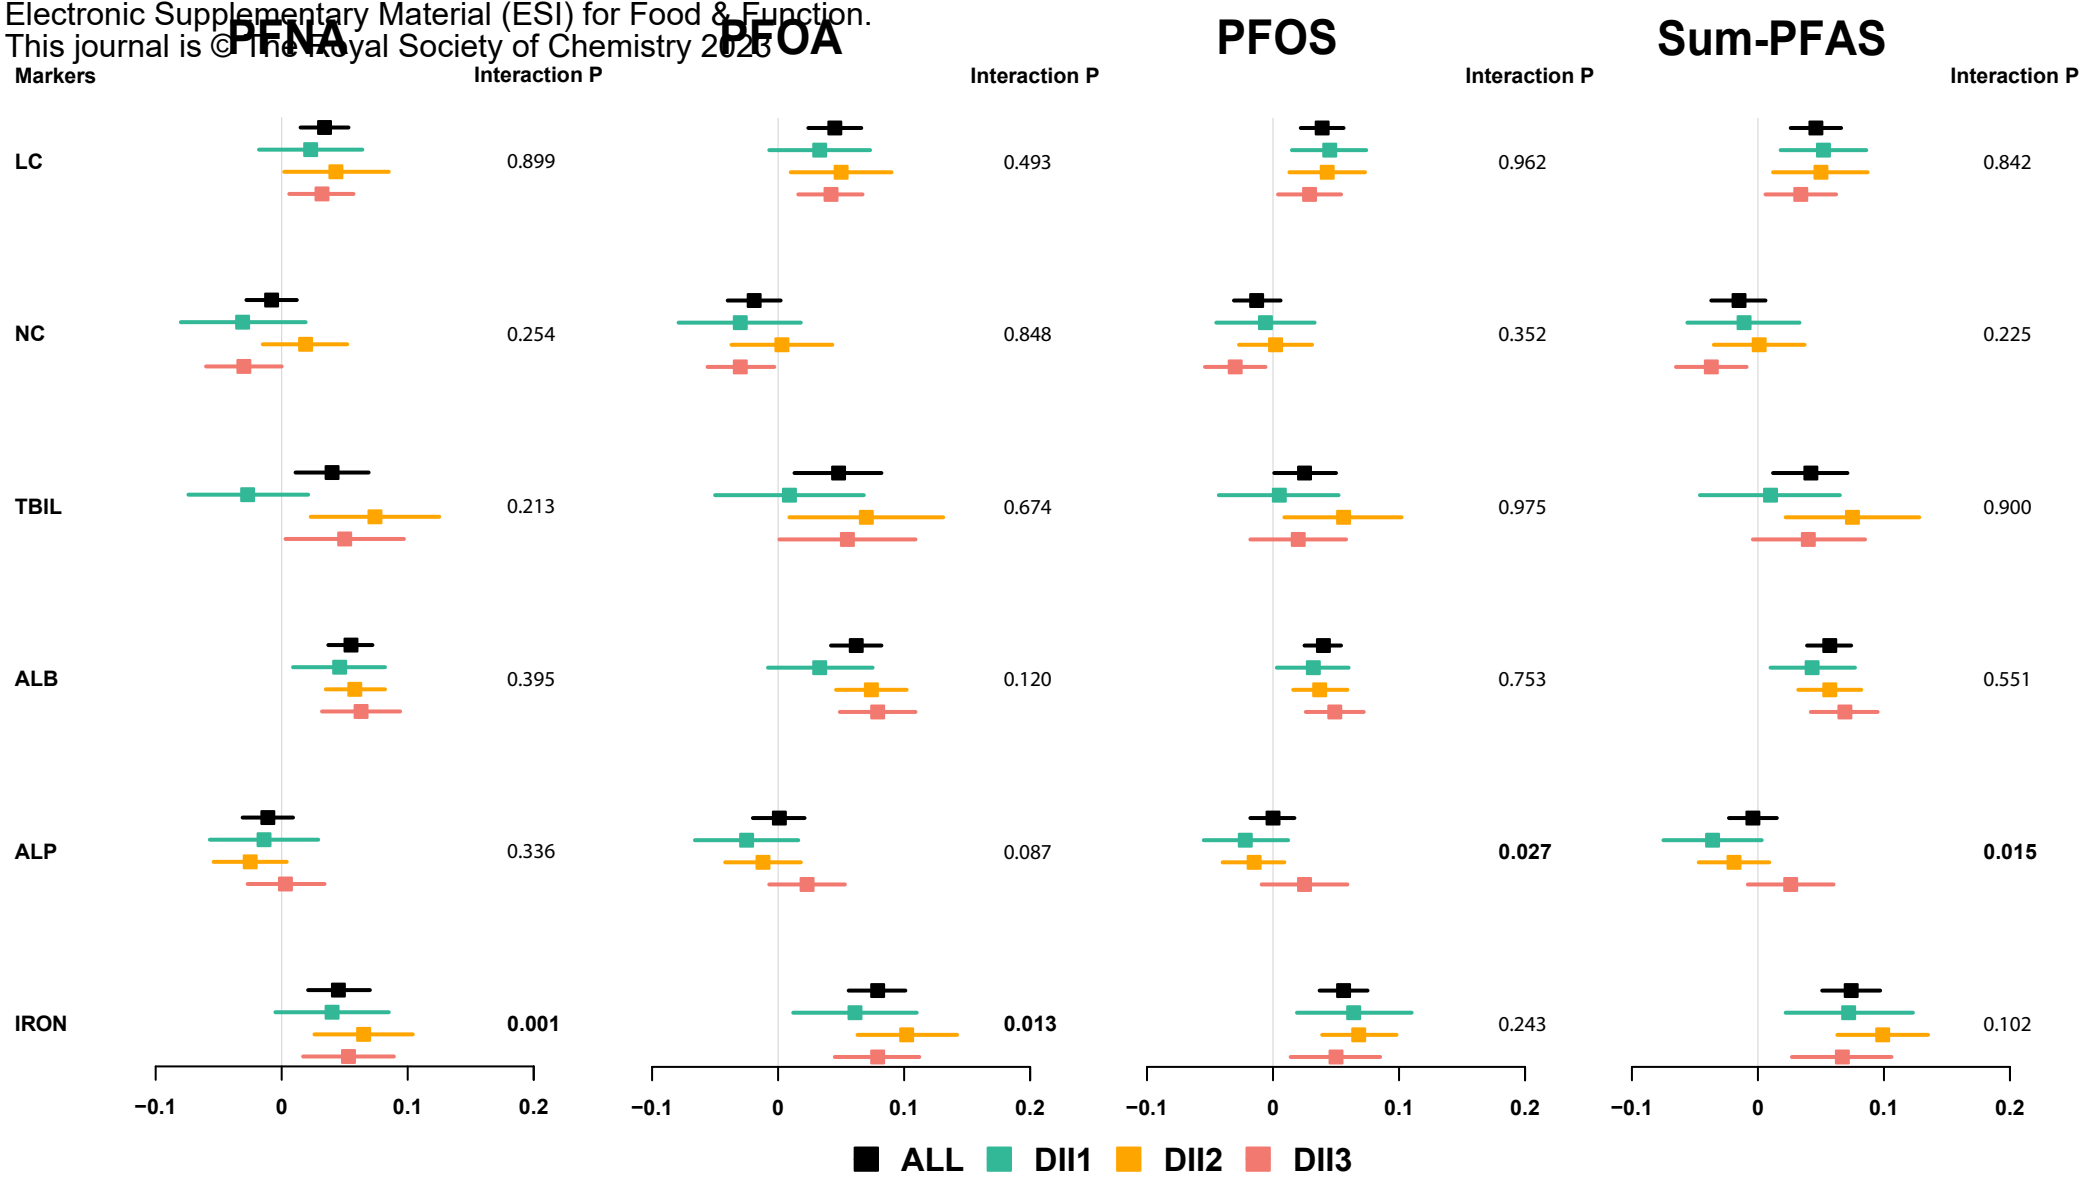

Supplement: d3fo01487h5.pdf [file d3fo01487h5.pdf]

# PFOA

# PFNA

# PFOS

# Sum-PFAS

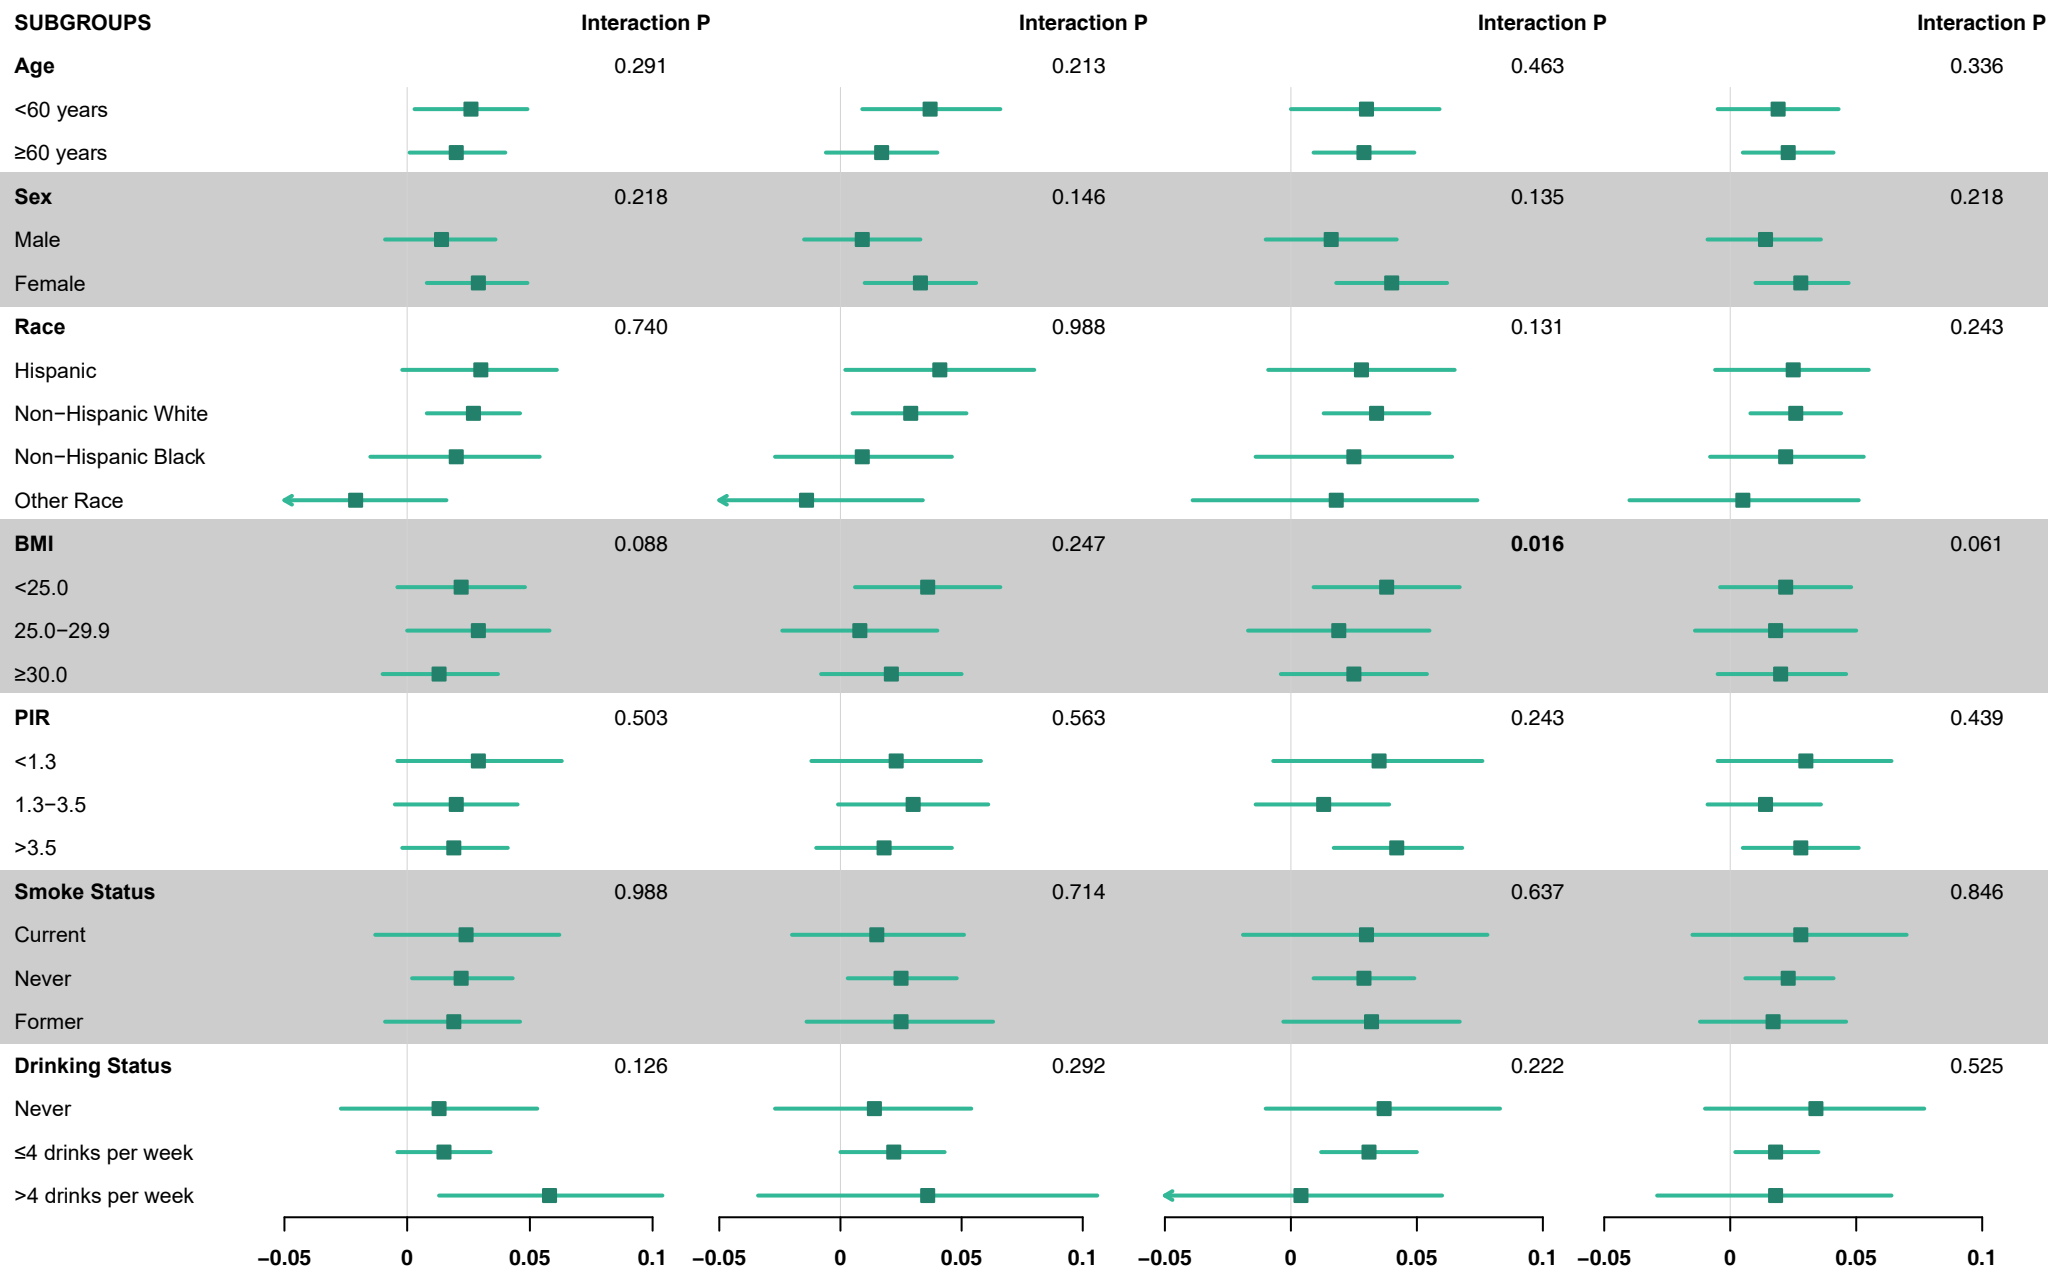

Supplement: d3fo01487h6.pdf [file d3fo01487h6.pdf]
